# Supplementary material for: Growth Performance, Waste Reduction Efficiency and Nutritional Composition of Black Soldier Fly (Hermetia illucens) Larvae and Prepupae Reared on Coconut Endosperm and Soybean Curd Residue with or without Supplementation
Source: MDPI journal article supplement (doi:10.3390/insects12080682), 2021-07-29
Supplement: s1 [file s1]

**Supplementary Table S1** Chemical composition of black soldier fly larvae and prepupae reared on mixed industrial by-products comparing with Gainesville and chicken diet.

| Parameters <sup>1</sup>          |                   |                       | Experimental Groups                      |                     |                     |                     |                       |                       | SEM   | p-Value |
|----------------------------------|-------------------|-----------------------|------------------------------------------|---------------------|---------------------|---------------------|-----------------------|-----------------------|-------|---------|
|                                  | Gainesville diet  | Chicken diet          | Coconut endosperm / Soybean curd residue |                     |                     |                     |                       |                       |       |         |
|                                  |                   |                       | 80/20                                    | 50/50               | 20/80               | 80/20               | 50/50                 | 20/80                 |       |         |
|                                  |                   |                       | Supplementation <sup>2</sup>             |                     |                     |                     |                       |                       |       |         |
|                                  |                   |                       | No                                       | No                  | No                  | Yes                 | Yes                   | Yes                   |       |         |
| Chemical composition of larvae   |                   |                       |                                          |                     |                     |                     |                       |                       |       |         |
| Dry matter (%FM)                 | 32.2 <sup>a</sup> | 35.5 <sup>b</sup>     | 39.4 <sup>c</sup>                        | 35.5 <sup>b</sup>   | 33.5 <sup>a,b</sup> | 34.2 <sup>a,b</sup> | 34.9 <sup>b</sup>     | 33.5 <sup>a,b</sup>   | 0.476 | <0.001  |
| Ash (%DM)                        | 14.7 <sup>d</sup> | 12.9 <sup>c</sup>     | 3.58 <sup>a</sup>                        | 4.03 <sup>a,b</sup> | 4.51 <sup>b</sup>   | 13.1 <sup>c</sup>   | 14.1 <sup>d</sup>     | 17.4 <sup>e</sup>     | 1.087 | <0.001  |
| Crude protein (%DM)              | 48.3 <sup>e</sup> | 43.7 <sup>c,d</sup>   | 34.8 <sup>a</sup>                        | 44.7 <sup>d</sup>   | 49.4 <sup>e</sup>   | 34.4 <sup>a</sup>   | 38.5 <sup>b</sup>     | 42.1 <sup>c</sup>     | 1.120 | <0.001  |
| Ether extract (%DM)              | 20.7 <sup>a</sup> | 26.9 <sup>b,c</sup>   | 49.1 <sup>e</sup>                        | 38.7 <sup>d</sup>   | 35.1 <sup>d</sup>   | 34.7 <sup>d</sup>   | 29.3 <sup>c</sup>     | 23.1 <sup>a,b</sup>   | 1.842 | <0.001  |
| Chemical composition of prepupae |                   |                       |                                          |                     |                     |                     |                       |                       |       |         |
| Dry matter (%FM)                 | 35.7 <sup>a</sup> | 37.9 <sup>a,b,c</sup> | 39.2 <sup>c</sup>                        | 38.5 <sup>b,c</sup> | 36.2 <sup>a,b</sup> | 35.8 <sup>a,b</sup> | 38.2 <sup>a,b,c</sup> | 38.3 <sup>a,b,c</sup> | 0.364 | 0.04    |
| Ash (%DM)                        | 15.8 <sup>e</sup> | 12.5 <sup>c</sup>     | 3.93 <sup>a</sup>                        | 4.28 <sup>a,b</sup> | 5.00 <sup>b</sup>   | 15.0 <sup>d</sup>   | 16.3 <sup>e,f</sup>   | 17.1 <sup>f</sup>     | 1.137 | <0.001  |
| Crude protein (%DM)              | 48.4 <sup>e</sup> | 45.6 <sup>d</sup>     | 41.7 <sup>b</sup>                        | 47.3 <sup>e</sup>   | 50.7 <sup>f</sup>   | 36.9 <sup>a</sup>   | 40.8 <sup>b</sup>     | 43.2 <sup>c</sup>     | 0.893 | <0.001  |
| Ether extract (%DM)              | 24.1 <sup>a</sup> | 30.6 <sup>b,c</sup>   | 42.2 <sup>f</sup>                        | 35.8 <sup>d,e</sup> | 33.4 <sup>c,d</sup> | 38.7 <sup>e</sup>   | 31.6 <sup>c</sup>     | 28.4 <sup>b</sup>     | 1.167 | <0.001  |

<sup>1</sup> The differences on superscripts in the same row represented the statistical significant difference at  $p < 0.05$ .

<sup>2</sup> Each diet contains five grams of supplement comprise monocalcium phosphate, lime stone, DL-methionine, L-lysine, L-threonine, lard and vitamin-mineral premix<sup>4</sup> at 2.2g, 1g, 0.3g, 0.14g, 0.06g, 1g and 0.3 g, respectively.

<sup>3</sup> Vitamin-mineral premix (Feed specialties Co., Ltd; Pathumthani, Thailand) were supplied per kilogram of diets at 2,500,000 IU of vitamin A; 1,000,000 IU of vitamin D3; 7,000 IU of vitamin E; 700 mg of vitamin K; 400 mg of vitamin B1; 800 mg of vitamin B2; 400 mg of vitamin B6; 4 mg of vitamin B12; 30 mg of biotin; 3,111 mg of Ca pantothenate acid; 100 mg of folic acid; 15,000 mg of vitamin C; 5,600 mg of vitamin B3, 10,500 mg of Zn, 10,920 mg of Fe; 9,960 mg of Mn; 3,850 mg of Cu; 137 mg of I; 70 mg of Se.
